# Supplementary material for: Genetic Factors Explain a Major Fraction of the 50% Lower Lipoprotein(a) Concentrations in Finns
Source: PubMed Central journal article supplement (PMC5943067; doi:10.1161/atvbaha.118.310865), 2018-03-22
Supplement: atv-38-1230-s001.pdf [file atv-38-1230-s001.pdf]

## Major Resources Table

### Antibodies

| Target antigen                                                        | Vendor or Source  | Catalog #         | Working concentration                                                                                     | Lot # (preferred but not required) |
|-----------------------------------------------------------------------|-------------------|-------------------|-----------------------------------------------------------------------------------------------------------|------------------------------------|
| affinity-purified polyclonal rabbit anti-human apo(a) antibody        | produced in-house | produced in-house | 5 µg/ml in 1x PBS containing 1 mg/mL NaN <sub>3</sub> for ELISA                                           | -                                  |
| horseradish-peroxidase-conjugated monoclonal anti-apo(a) antibody 1A2 | produced in-house | produced in-house | Conjugate stock stored 1:7,000 in glycerol, then diluted 1:4,800 in Assay Buffer (Microcoat, Bernried, D) | -                                  |
| 1A2 monoclonal anti-apo(a) antibody for Western blotting              | produced in-house | produced in-house | 168 ng/ml in Buffer C (85 mM NaCl, 10 mM TRIS, 0.2% Triton X-100, 1% BSA)                                 | -                                  |
| horseradish-peroxidase conjugated goat anti-mouse                     | Millipore         | 401253            | 1:13,333 in Buffer C (85 mM NaCl, 10 mM TRIS, 0.2% Triton X-100, 1% BSA)                                  | -                                  |
