# Supplementary material for: Genetic Factors Explain a Major Fraction of the 50% Lower Lipoprotein(a) Concentrations in Finns
Source: PubMed Central journal article supplement (PMC5943067; doi:10.1161/atvbaha.118.310865), 2018-03-22

# Factors explaining the 50% lower Lp(a) levels in a Finnish population compared to Central Europeans

Lp(a) levels in Central Europeans

More large apo(a) isoforms

Differences in LPA SNP frequencies

Younger age

Female sex

Better kidney function

Less apoE2

Unknown factors

Lp(a) level in Finns

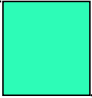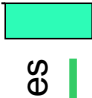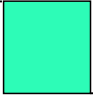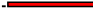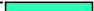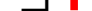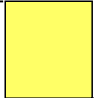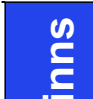

Supplement: atv-38-1230-s003.pdf [file atv-38-1230-s003.pdf]
